# Supplementary figures and images for: Ingesting a pre-workout supplement containing caffeine, B-vitamins, amino acids, creatine, and beta-alanine before exercise delays fatigue while improving reaction time and muscular endurance
Source: Springer Nature journal article supplement (doi:10.1186/1743-7075-9-28), 2012-03-30

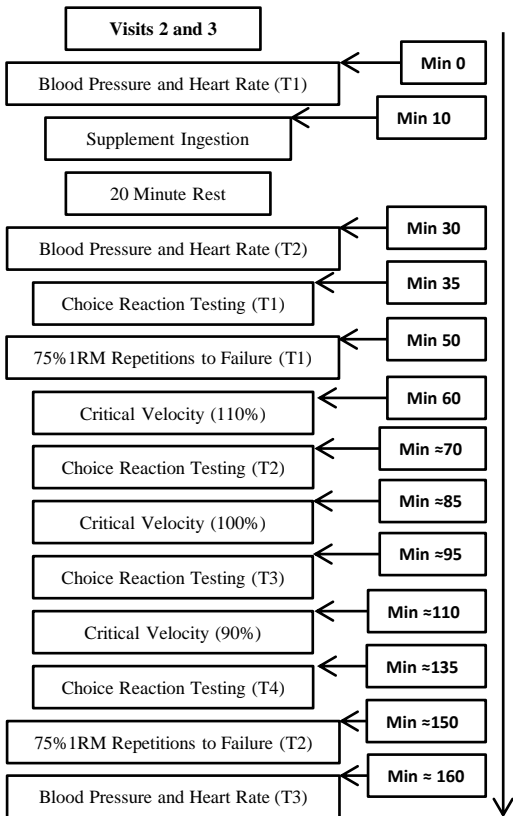

Supplement: 12986_2011_418_MOESM1_ESM.pdf [file 12986_2011_418_MOESM1_ESM.pdf]
